# Supplementary material for: Urolithin-A attenuates neurotoxoplasmosis and alters innate response towards predator odor
Source: PubMed Central journal article supplement — Brain Behav Immun Health. 2020 Aug 11;8:100128. doi: 10.1016/j.bbih.2020.100128 (PMC8474456; doi:10.1016/j.bbih.2020.100128), 2020-08-11
Supplement: mmc1.pdf [file mmc1.pdf]

**Urolithin-A attenuates neurotoxoplasmosis and alters innate response towards predator odor**

Sijie Tan, Wen Han Tong, Ajai Vyas

**Content:**

This file contains the Supplementary Figures S1-2 and the accompanying figure legends.

# Supplementary Figure 1

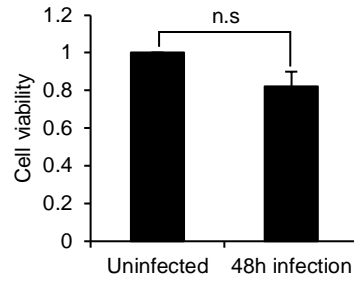

**48h *T. gondii* infection does not induce significant cell death in differentiated neural cells.** Differentiated ReNcell were infected with wild-type Pru *T. gondii* for 48h or left uninfected. MTS assay was performed to examine cell viability. All values are mean  $\pm$  S.E.M (n=3). Difference against uninfected cells was not significant (n.s).

# Supplementary Figure 2

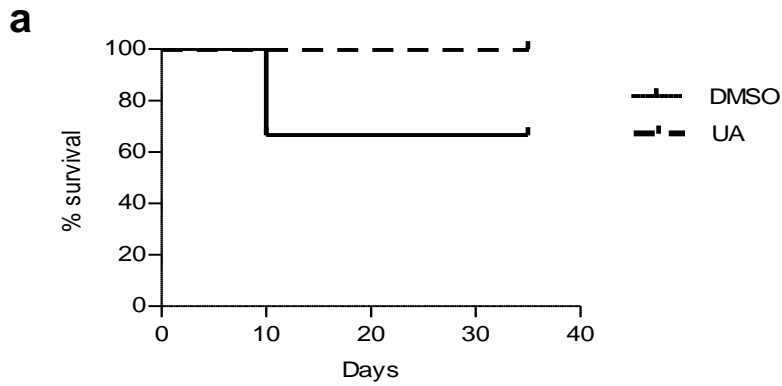

**b**

Table depicting the  $2^{\Delta Ct}$  values of *SAG1* expression in infected mice. Majority of the *SAG1* expression in the DMSO and UA experimental animals were lower than the uninfected control animal.

| Animal Identity      | $2^{\Delta Ct}$ | ~ Fold change (against uninfected) |        |
|----------------------|-----------------|------------------------------------|--------|
| Uninfected           | 1.09e-4         | 1                                  |        |
| Positive control     | 1.47            | > 10,000                           |        |
| Experimental animals | DMSO #1         | 6.14e-5                            | < 1    |
|                      | DMSO #2         | 4.43e-7                            | < 0.01 |
|                      | DMSO #3         | 1.69e-6                            | < 0.1  |
|                      | DMSO #4         | 7.13e-6                            | < 0.1  |
|                      | UA #1           | 6.65e-7                            | <0.01  |
|                      | UA #2           | 8.81e-4                            | 8      |
|                      | UA #3           | 3.13e-5                            | < 1    |
|                      | UA #4           | 1.50e-6                            | < 0.1  |
|                      | UA #5           | 1.03e-4                            | < 1    |
|                      | UA #6           | 7.55e-5                            | < 1    |

**Mortality and *SAG1* expression in *T. gondii* infected mice.** (a) Survival graph of the DMSO and UA-injected mice throughout the experimental duration. 6 DMSO and 6 UA mice were present at the start of the experiment. (b) *SAG1* mRNA levels in the DMSO and UA-injected experimental animals that survived till the end of the experiment, normalized against the *GAPDH* mRNA and expressed as fold-change against the uninfected control. The positive control animal was acutely infected with type II *Pr*u *T. gondii* strain. Here, it is used as a control to show that the *SAG1* qPCR amplification was working.
